# Supplementary material for: Tailored polyethylene glycol grafting on porous nanoparticles for enhanced targeting and intracellular siRNA delivery
Source: Royal Society of Chemistry journal article supplement (doi:10.1039/d2nr02995b), 2022-01-01
Supplement: d2nr02995b1.pdf [file d2nr02995b1.pdf]

Electronic Supplementary Information (ESI)

**Tailored polyethylene glycol grafting on porous nanoparticles for  
enhanced targeting and intracellular siRNA delivery**

Jounghyun Yoo,<sup>‡a</sup> Kyunghwan Kim,<sup>‡b</sup> Suhyun Kim,<sup>a</sup> Hee Ho Park,<sup>\*c</sup> Heungsoo Shin,<sup>\*c</sup> and  
Jinmyoung Joo<sup>\*a</sup>

<sup>a</sup> Department of Biomedical Engineering, Ulsan National Institute of Science and Technology,  
Ulsan 44919, Republic of Korea. E-mail: [jjoo@unist.ac.kr](mailto:jjoo@unist.ac.kr)

<sup>b</sup> Department of Chemistry, Ulsan National Institute of Science and Technology, Ulsan 44919,  
Republic of Korea

<sup>c</sup> Department of Bioengineering, Hanyang University, Seoul 04763, Republic of Korea. E-mail:  
[hshin@hanyang.ac.kr](mailto:hshin@hanyang.ac.kr), [parkhh@hanyang.ac.kr](mailto:parkhh@hanyang.ac.kr)

<sup>‡</sup> These authors contributed equally to this work.

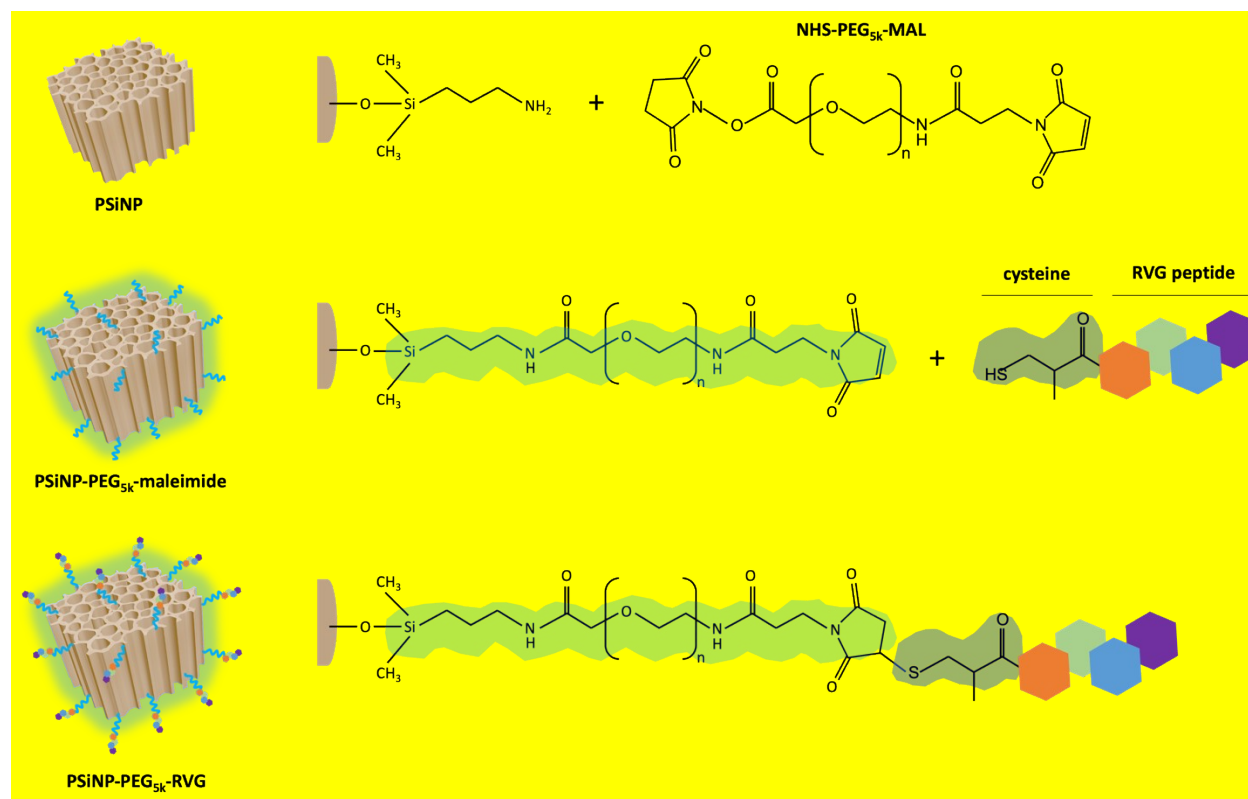

**Figure S1.** Schematic illustrations of RVG peptide conjugation on the PSiNPs.

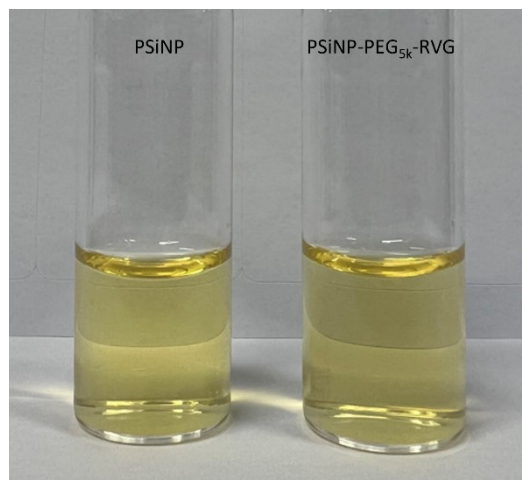

**Figure S2.** Photographs of aqueous PSiNPs before and after RVG peptide conjugation.

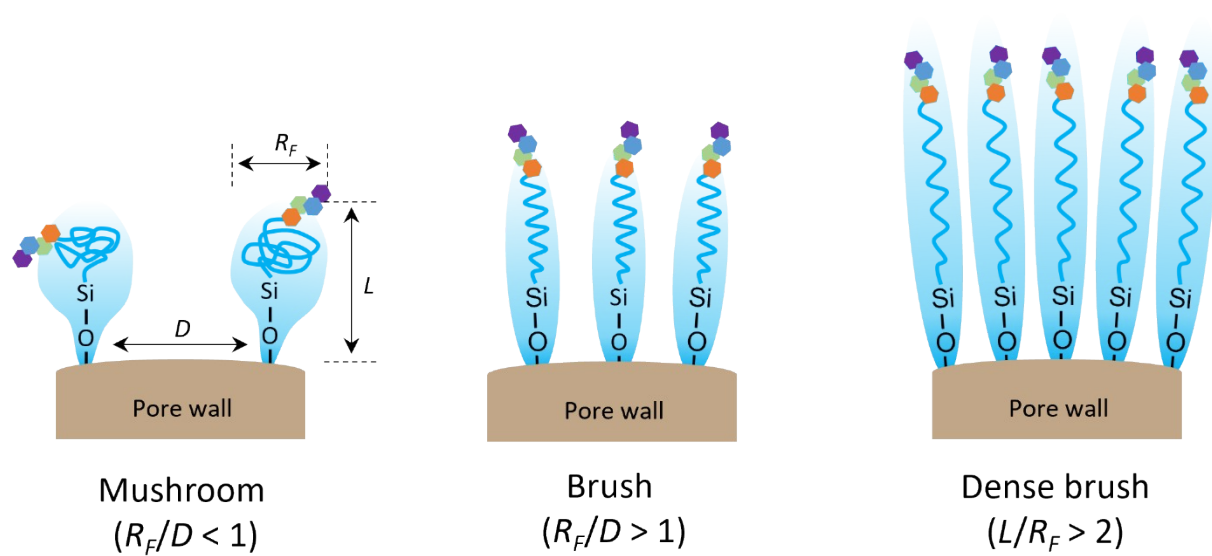

**Figure S3.** Schematic illustrations of PEG conformation depending on the grafting density.

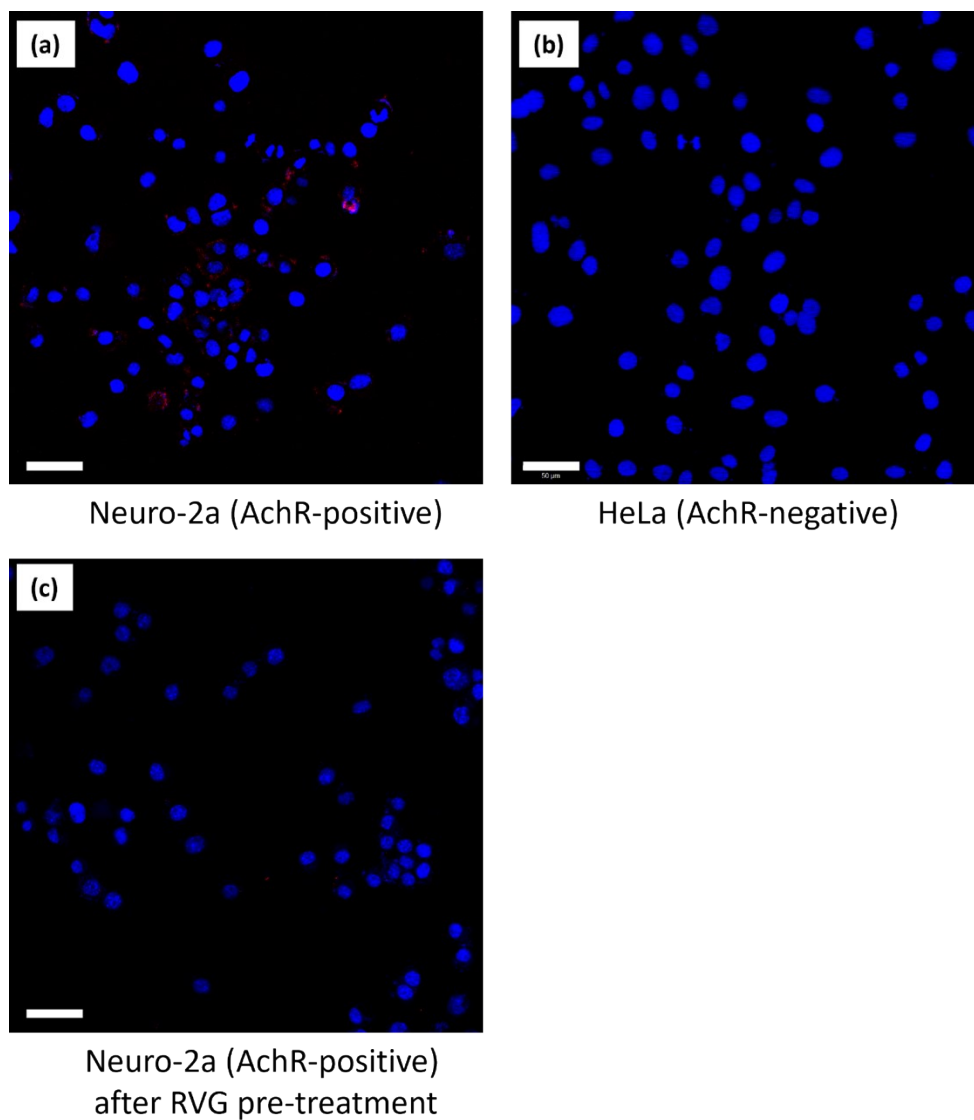

**Figure S4.** Confocal laser scanning microscopy images. (a) Neuro-2a and (b) HeLa cells treated with PSiNP-PEG<sub>5k</sub>-RVG for 2 h. (c) Neuro-2a cells treated with free RVG peptide prior to incubation with PSiNPs-PEG<sub>5k</sub>-RVG. Scale bar: 50  $\mu$ m.

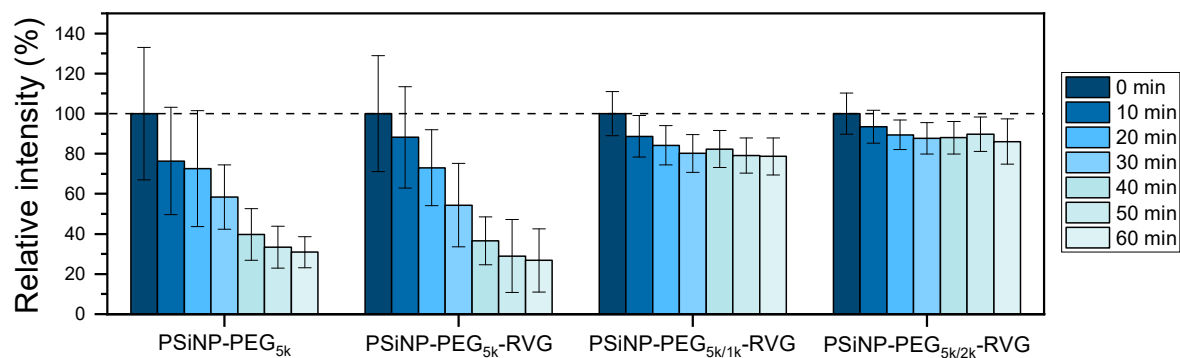

**Figure S5.** Reduced cellular uptake of PSiNPs upon pre-incubation in serum-containing culture media prior to cellular exposure. Relative photoluminescence intensity ( $\pm$  standard deviation) of PSiNPs found in a cell ( $n = 50$ ) after pre-incubation in serum-rich cell culture media for designated time as indicated.

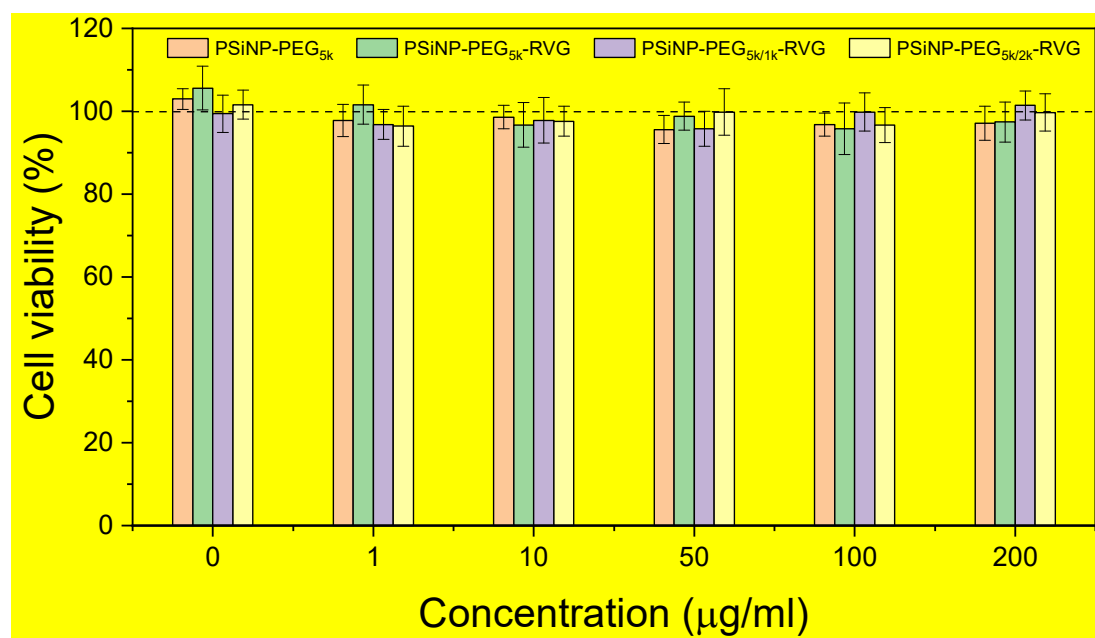

**Figure S6.** *In vitro* concentration-dependent cell viability towards Neuro-2a cells upon treatment for 24 h with PSiNPs containing PEG chains as indicated.

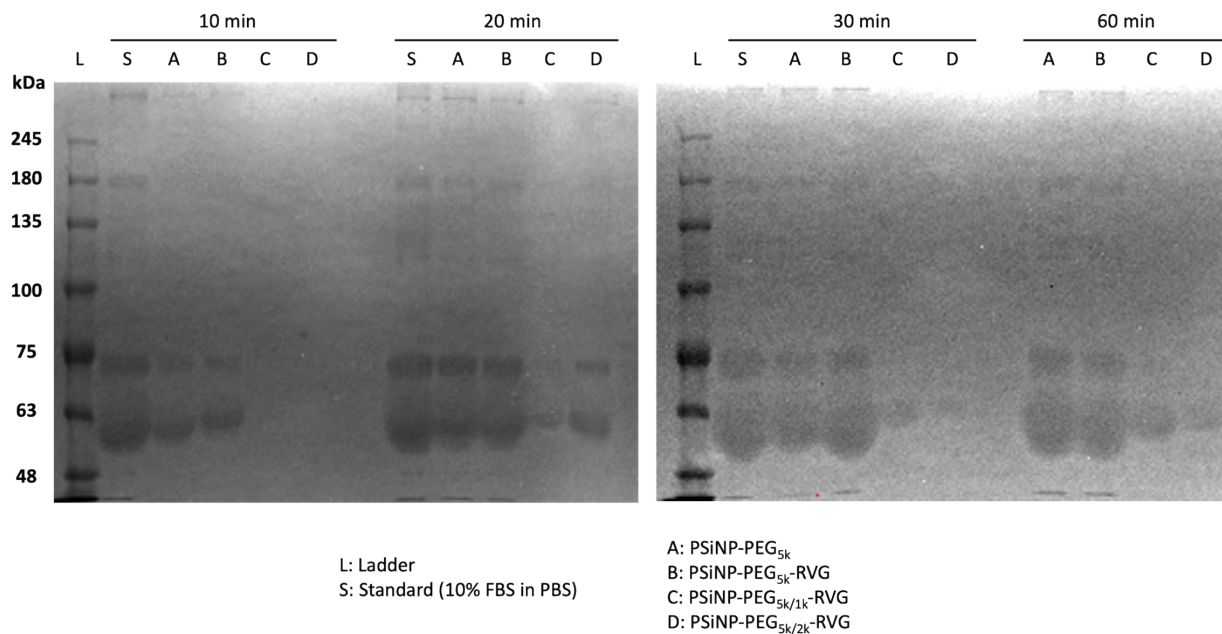

**Figure S7.** SDS-PAGE analysis of proteins adsorbed to the PSiNPs depending on surface PEG grafting types and pre-exposure time as indicated. Although the serum proteins were non-specifically adsorbed to all types of PSiNPs, the secondary packaging leads less protein binding. Note that PSiNP-PEG<sub>5k</sub> and PSiNP-PEG<sub>5k</sub>-RVG also slightly reduce the protein binding, indicating that the secondary packaging is essential for efficient prevention of non-specific protein adsorption on mesoporous nanoparticles such as PSiNPs.

**Table S1.** Conformational factors that determine the PEG types on PSiNPs.

| PSiNP formulations                 | Primary grafting PEG   | Secondary packaging PEG |                         | $L$ (nm) <sup>b</sup> | $D$ (nm) <sup>c</sup> | $R_F/D^d$ | $L/R_F^d$ | PEG conformation |
|------------------------------------|------------------------|-------------------------|-------------------------|-----------------------|-----------------------|-----------|-----------|------------------|
|                                    | Molecular weight (kDa) | Molecular weight (kDa)  | $R_F$ (nm) <sup>a</sup> |                       |                       |           |           |                  |
| PSiNPs-PEG <sub>5k/1k</sub> -RVG   | 5                      | 1                       | 1.78                    | 9.5                   | 2.70                  | 2.13      | 1.66      | Brush            |
| PSiNPs-PEG <sub>5k/2k</sub> -RVG   |                        | 2                       | 3.10                    | 17.0                  | 1.13                  | 5.09      | 2.96      | Dense brush      |
| PSiNPs-PEG <sub>5k/3.4k</sub> -RVG |                        | 3.4                     | 4.48                    | 10.5                  | 2.33                  | 2.47      | 1.83      | Brush            |
| PSiNPs-PEG <sub>5k</sub> -RVG      |                        | -                       | 5.74                    | 4.5                   | 8.29                  | 0.69      | 0.78      | Mushroom         |

<sup>a</sup> Flory radius ( $R_F$ ) is determined by the equation:  $R_F = \alpha N^{3/5}$ , where  $\alpha$  is the monomer length (0.35 nm for PEG) and  $N$  is the number of PEG repeating unit.

<sup>b</sup> PEG layer thickness ( $L$ ) is estimated from hydrodynamic radius and size of RVG peptide.

<sup>c</sup> Grafting distance ( $D$ ) is obtained by the equation:  $D = \left( \frac{N}{L} (\alpha^{5/3}) \right)^{3/2}$ , where  $\alpha$  is the monomer length (0.35 nm for PEG),  $N$  is the number of PEG repeating unit, and  $L$  is the PEG layer thickness.

<sup>d</sup>  $R_F$  value of PEG 5 kDa is used since the major PEG chains for conformational transition induced by secondary packaging is PEG 5 kDa.
